# Prediction of Ubiquitination Sites by Using the Composition of *k*-Spaced Amino Acid Pairs

Zhen Chen<sup>1,2</sup>, Yong-Zi Chen<sup>3</sup>, Xiao-Feng Wang<sup>1,2</sup>, Chuan Wang<sup>1,2</sup>, Ren-Xiang Yan<sup>1,2</sup>, Ziding Zhang<sup>1,2\*</sup>

**1** State Key Laboratory of Agrobiotechnology, College of Biological Sciences, China Agricultural University, Beijing, China, **2** Bioinformatics Center, College of Biological Sciences, China Agricultural University, Beijing, China, **3** Tianjin Cancer Institute, Tianjin Medical University Cancer Institute and Hospital, Tianjin, China

## Abstract

As one of the most important reversible protein post-translation modifications, ubiquitination has been reported to be involved in lots of biological processes and closely implicated with various diseases. To fully decipher the molecular mechanisms of ubiquitination-related biological processes, an initial but crucial step is the recognition of ubiquitylated substrates and the corresponding ubiquitination sites. Here, a new bioinformatics tool named CKSAAP\_UbSite was developed to predict ubiquitination sites from protein sequences. With the assistance of Support Vector Machine (SVM), the highlight of CKSAAP\_UbSite is to employ the composition of *k*-spaced amino acid pairs surrounding a query site (i.e. any lysine in a query sequence) as input. When trained and tested in the dataset of yeast ubiquitination sites (Radivojac et al, *Proteins*, 2010, 78: 365–380), a 100-fold cross-validation on a 1:1 ratio of positive and negative samples revealed that the accuracy and MCC of CKSAAP\_UbSite reached 73.40% and 0.4694, respectively. The proposed CKSAAP\_UbSite has also been intensively benchmarked to exhibit better performance than some existing predictors, suggesting that it can be served as a useful tool to the community. Currently, CKSAAP\_UbSite is freely accessible at [http://protein.cau.edu.cn/cksaap\\_ubsite/](http://protein.cau.edu.cn/cksaap_ubsite/). Moreover, we also found that the sequence patterns around ubiquitination sites are not conserved across different species. To ensure a reasonable prediction performance, the application of the current CKSAAP\_UbSite should be limited to the proteome of yeast.

**Citation:** Chen Z, Chen Y-Z, Wang X-F, Wang C, Yan R-X, et al. (2011) Prediction of Ubiquitination Sites by Using the Composition of *k*-Spaced Amino Acid Pairs. *PLoS ONE* 6(7): e22930. doi:10.1371/journal.pone.0022930

**Editor:** Franca Fraternali, King's College London, United Kingdom

**Received:** April 12, 2011; **Accepted:** July 1, 2011; **Published:** July 29, 2011

**Copyright:** © 2011 Chen et al. This is an open-access article distributed under the terms of the Creative Commons Attribution License, which permits unrestricted use, distribution, and reproduction in any medium, provided the original author and source are credited.

**Funding:** This work was supported by the National Key Basic Research Project of China (2009CB918802), the National Natural Science Foundation of China (31070259 and 30830058), and the State Education Ministry of China (20070019050). The funders had no role in study design, data collection and analysis, decision to publish, or preparation of the manuscript.

**Competing Interests:** The authors have declared that no competing interests exist.

\* E-mail: [zidingzhang@cau.edu.cn](mailto:zidingzhang@cau.edu.cn)

## Introduction

As one of the most important reversible protein post-translational modifications (PTMs), ubiquitination occurs when ubiquitin (Ub) is covalently attached to lysine (K) residues of targeting proteins (i.e. ubiquitylated substrates). Three enzymes are implicated in the process of ubiquitination, including Ub-activating (E1), Ub-conjugating (E2) and Ub-ligating (E3) enzymes, and the types of ubiquitination are diverse (e.g. the targeting proteins can be linked with a single Ub or poly-Ub chains) [1–4]. Ubiquitination has been reported to be involved in regulating a variety of basic cellular processes, including the degradation of protein [5,6], gene transcription, DNA repair and replication, intracellular trafficking and virus budding [1]. Meanwhile, increasing evidences have also demonstrated that the change of the ubiquitination system is closely related with cellular transformation, immune response and inflammatory response [7]. Of the aforementioned functional roles, the regulatory function of the Ub-proteasome system is certainly of utmost significance for cellular homeostasis. About 80% of the cellular proteins are degraded by the Ub-proteasome system [8].

To decipher the mechanism of Ub-proteasome system or other regulatory roles of ubiquitination at the molecular level, an initial but crucial step is to identify ubiquitylated substrates and the corresponding ubiquitination sites [1]. Researchers have employed

several experimental methods to purify ubiquitylated proteins such as the use of affinity-tagged Ub, Ub antibodies and Ub-binding proteins, and high-throughput mass-spectrometry (MS) technique [9,10]. So far, hundreds of ubiquitylated proteins and the corresponding ubiquitination sites have been experimentally determined [10,11], which have been further compiled into some user-friendly databases such as UbiProt (<http://ubiprot.org.ru/>) [12], SCUD (<http://scud.kaist.ac.kr>) [13] and SysPTM (<http://www.sysbio.ac.cn/SysPTM>) [14]. Although the specific molecular mechanism of Ub conjugation reaction to ubiquitylated substrates remains elusive [2], the accumulated data have strengthened our fundamental understanding of the sequence/structural characteristics around ubiquitination sites. Catic and co-workers (2004) systematically analyzed 135 ubiquitination sites in 95 yeast proteins [15]. From the structural context, they found that ubiquitination sites preferred to be exposed at the molecular surface and reside in loop regions [15]. Regarding the sequence context, they also discovered a sequence motif 'KEEE', which may be frequently employed for the attachment of Ub in yeast [15]. In 2010, Radivojac et al also analyzed the structural context of ubiquitination sites and confirmed that these sites were preferentially located in intrinsically disordered regions [2].

Considering that ubiquitination is rapid and reversible, the large-scale identification of ubiquitylated proteins and ubiquitination sites is labor-intensive and time-consuming. Parallel to the

experimental identification of ubiquitination sites, there is still a serious need for bioinformatics methods to predict potential ubiquitination sites in query proteins. Similar to the development of other PTM site predictors [16–19], the input for an ubiquitination site predictor is generally presented by a sequence fragment of  $2n + 1$  residues with the residue K in the central position (i.e. the window size is equal to  $2n+1$ ). An appropriate feature construction or encoding scheme of the sequence fragment is further required for the processing of a prediction algorithm. Finally, a predictor can be established by some statistical- or machine learning-based algorithms.

Up to now, several ubiquitination site prediction methods have been developed elegantly. Tung and Ho (2008) [3] developed an ubiquitination site predictor (UbiPred) using a Support Vector Machine (SVM) with 31 informative physicochemical features selected from the published amino acid indices [20]. In 2010, Radivojac et al also proposed a random forest-based predictor called UbPred, in which 586 sequence attributes were employed as the input feature vector [2]. Very recently, Cai et al developed a nearest neighbor algorithm-based ubiquitination site predictor [21]. They identified key components from 541 features and used the incremental feature selection method procedure to maximize the predictor performance [21]. It is worth mentioning that the practical applications of these established predictors have already been exploited and some prediction results have been converted into new biological findings. For instance, UbPred was employed for a proteome-wide ubiquitination site prediction in yeast [2]. Based on the prediction results, it was established that highly ubiquitylated proteins were enriched among transcription/enzyme regulators and proteins involved in cell cycle control [2].

The overall performance of the aforementioned three exciting predictors is still not fully satisfactory and there is still room to improve the predictive accuracy. In this study, we focused on developing a new ubiquitination site predictor by seeking a more informative encoding scheme. After our preliminary assessment of different encoding schemes, we found that the composition of  $k$ -spaced amino acid pairs (CKSAAP) is suitable for representing the sequence context surrounding the ubiquitination sites. CKSAAP reflects the short range interactions of residues within a sequence or a sequence fragment, which has been successfully employed for the prediction of protein flexible/rigid regions [22], protein crystallization [23], protein structural classes [24], membrane protein types [25–27], mucin-type O- glycosylation sites [16], palmitoylation sites [28], etc. With the assistance of SVM, we proposed a predictor called CKSAAP\_UbSite to detect ubiquitination sites in query proteins. Here, we present details on the construction of CKSAAP\_UbSite, the overall performance assessment, and the intensive benchmark experiments against some existing predictors. In particular, why CKSAAP is suitable for the prediction of ubiquitination sites is also discussed.

## Methods

### Datasets

To construct CKSAAP\_UbSite, 203 ubiquitylated substrates, which were previously compiled by Radivojac et al [2], were downloaded from [http://www.ubpred.org/sgd\\_predictions.txt.gz](http://www.ubpred.org/sgd_predictions.txt.gz). These 203 proteins contained 272 experimentally validated ubiquitination sites, which are regarded as positive samples. Generally, all the remaining K residues that were not reported as ubiquitination sites in these proteins can be regarded as negative samples (i.e. non-ubiquitination sites). It should be clearly pointed out that these remaining residues may contain ubiquitination sites that are not experimentally identified yet. By employing the

similar strategy as the work of Radivojac et al [2], we extracted 4642 negative samples from the 124 mitochondrial matrix proteins. Since there is no chance for the mitochondrial matrix proteins accessible for the Ub-proteasome system [2], the reliability of the 4642 negative samples can be guaranteed. Thus, the 272 positive samples together with the 4642 negative samples were compiled into an initial dataset. As already mentioned in the Introduction section, each sample is represented by a sequence fragment with a window size of  $2n+1$ . According to our preliminary computational experiments, the window size was optimally set as 27 in this study. In order to avoid the overestimation of performance caused by the sequence redundancy, we took the threshold of 40% sequence identity to filter the initial dataset. Briefly, the filtering ensured that any fragment pair in all the remaining positive and negative samples shared a sequence identity less than 40%. Finally, we obtained a filtered ubiquitination site dataset containing 263 positive and 4345 negative samples (i.e. Radivojac\_dataset), which was used to train and test CKSAAP\_UbSite (see Supporting Information Text S1).

### Encoding schemes and feature selection

**The CKSAAP encoding scheme.** In this study, an ubiquitination or non-ubiquitination site is represented by a sequence fragment of 27 amino acids. Thus, the CKSAAP encoding means the composition of  $k$ -spaced residue pairs in the fragment. Taking  $k=0$  as an example, there are 400 0-spaced residue pairs (i.e., AA, AC, AD, ..., YY). Then, a feature vector can be defined as

$$\left( \frac{N_{AA}}{N_{Total}}, \frac{N_{AC}}{N_{Total}}, \frac{N_{AD}}{N_{Total}}, \dots, \frac{N_{YY}}{N_{Total}} \right)_{400} \quad (1)$$

The value of each feature denotes the composition of the corresponding residue pair in the fragment. For instance, if the residue pair AA appears  $m$  times in the fragment, the composition of the residue pair AA is equal to  $m$  divided by the total number of  $\theta$ -spaced residue pairs ( $N_{Total}$ ) in the fragment. For  $k=0, 1, 2, 3, 4$  and 5, the value of  $N_{Total}$  is 26, 25, 24, 23 and 22, respectively. In case a very few ubiquitination or non-ubiquitination sites are located in the N- or C-terminal of protein sequences, the corresponding values of  $N_{Total}$  should be adjusted accordingly. Considering that the CKSAAP encoding was performed over  $k=0, 1, 2, 3, 4$  and 5 in this study, the total dimension of the CKSAAP-based feature vector is 2400.

**The binary encoding scheme.** To benchmark against the CKSAAP encoding scheme, the binary encoding scheme was also carried out. For the sites located in N- or C-terminal, the number of residues may be less than 27. To ensure the binary encoding with a unified dimension (i.e. each site should be represented by a sequence fragment of 27 residues), we assigned a non-existing amino acid O to fill in the corresponding positions. Thus, 21 different amino acids are considered in the binary encoding, which are ordered as ACDEFGHIKLMNPQRSTVWYO. Briefly, each amino acid is represented by a 21-dimensional binary vector, e.g.

A(10000000000000000000000000000000), C(01000000000000000000000000000000), ..., O(01000000000000000000000000000001), etc. Because the central position is always K, it is not necessary to be taken into account. Therefore, the total dimension of the binary encoding scheme is  $21 \times 26 = 546$ .

**Feature selection.** Since the proposed CKSAAP encoding contains a large number of features, two well-established dimensionality reduction methods, Chi-Squared (CHI) [25] and Information Gain (IG) [22,24,25], were employed to rank the corresponding features in CKSAAP. Please refer to the

literature[25] for more details about the CHI and IG-based feature selections. To avoid the potential over-fitting problem, it is worth mentioning that the feature selection procedures were stringently conducted. In particular, the testing samples should always be excluded from the feature selection procedures.

### SVM learning

As a machine-learning method of binary classification, SVM aims to find a rule that best maps each member of a training set to the correct classification [29], which has been used for diverse prediction/classification tasks related to protein bioinformatics [30–33]. Using the CKSAAP encoding as input, the SVM was trained to distinguish ubiquitination and non-ubiquitination sites in this study. The implemented SVM algorithm was SVM-light (<http://svmlight.joachims.org/>) and the applied kernel function was the radial basis function (RBF). In order to maximize the performance of the SVM algorithm, two parameters (i.e. the regularization parameter  $C$  and the width parameter  $\gamma$ ) in the RBF kernel were preliminarily optimized through a grid search strategy. First, the range of  $C$  and  $\gamma$  was empirically set to be [0.5, 8.0] and [0.5, 16], respectively. Then, a step of 0.5 was assigned for  $C$  and  $\gamma$ , which resulted in a total number of  $16 \times 32 = 512$  grids. Finally, all the 512 grids were evaluated to determine the optimal SVM parameters.

### Performance assessment of CKSAAP\_UbSite

In this study, four measurements, i.e. Accuracy ( $Ac$ ), Sensitivity ( $Sn$ ), Specificity ( $Sp$ ), and Matthew correlation coefficient ( $MCC$ ) were used to evaluate the prediction performance. They are defined as:

$$Ac = \frac{tp + tn}{tp + fn + tn + fp} \quad (2)$$

$$Sn = \frac{tp}{tp + fn} \quad (3)$$

$$Sp = \frac{tn}{tn + fp} \quad (4)$$

$$MCC = \frac{tp \times tn - fp \times fn}{\sqrt{(tp + fp) \times (tp + fn) \times (tn + fn) \times (tn + fp)}} \quad (5)$$

where  $tp$ ,  $fp$ ,  $fn$  and  $tn$  represents the true positives, false positives, false negatives and true negatives, respectively. To provide a comprehensive understanding of the performance, we also used a Receiver Operating Characteristic (ROC) curve [34,35], which plots the true positive rate (i.e.  $Sn$ ) as a function of the false positive rate (i.e.  $1-Sp$ ) for all possible thresholds. Furthermore, the overall performance of CKSAAP\_UbSite can also be quantified by the corresponding area under the ROC curve (AUC). Generally, the closer the AUC value is to 1, the better the performance is.

## Results and Discussion

### Performance of CKSAAP\_UbSite

The proposed CKSAAP\_UbSite predictor was trained and tested on a balanced dataset (i.e. 263 ubiquitination sites and 263 non-ubiquitination sites selected from Radivojac\_dataset) through a 100-fold cross-validation. Since the number of available non-

ubiquitination sites in Radivojac\_dataset is much larger than that of ubiquitination sites, we repeated the above training/testing procedures 10 times by randomly changing the negative samples (see Supporting Information Text S1 for more details about the 10 different sets of negative samples). To have a stringent assessment of CKSAAP\_UbSite, the same SVM parameters should be used in these 10 different sets. Therefore, we conducted the grid search on the 100-fold cross-validation through the 10 different sets. The parameters  $C = 2.0$  and  $\gamma = 8.0$ , which resulted in the best performance (i.e. the average  $Ac$  over all the cross-validation is the highest), were considered as the optimal SVM parameters of CKSAAP\_UbSite. The average performance of CKSAAP\_UbSite is summarized in Table 1. The detailed performance measurements for these 10 benchmark experiments are listed in Supporting Information Text S2. In general, the performance of CKSAAP\_UbSite is reasonably good. The average  $Ac$  of CKSAAP\_UbSite reached 73.40% ( $Sn = 69.85\%$ ,  $Sp = 76.96\%$ ,  $MCC = 0.4694$ ) (Table 1). Furthermore, the ROC curve of CKSAAP\_UbSite was plotted in Figure 1 and the corresponding value of AUC was 81.0%. At a less than 10% false positive rate control, CKSAAP\_UbSite can correctly identify about 52.5% ubiquitination sites.

Because of the high dimension of the CKSAAP encoding, two feature selection methods were conducted to find the most relevant features and to reduce the dimensionality of the encoding. It was observed that the improvements after both feature selections are negligible (data not shown), which could be ascribed to the following two aspects. First, SVM has a good tolerance to high dimensional data (i.e. SVM is not sensitive to the so called “the curse of dimensionality”). Second, the number of positive samples is too small and the selected features based merely on the training dataset could not reflect the overall characteristic around the ubiquitination sites.

To facilitate the community’s research, a web server of CKSAAP\_UbSite was constructed and is freely available at [http://protein.cau.edu.cn/cksaap\\_ubsite/](http://protein.cau.edu.cn/cksaap_ubsite/), which can be further used for proteome-wide ubiquitination site identification. To provide a more stable prediction result, 10 SVM predictors corresponding to 10 different sets of negative samples were jointly utilized. It should be emphasized that the optimal SVM parameters (i.e.  $C = 2.0$  and  $\gamma = 8.0$ ) was used to construct these 10 SVM predictors. For a query site, the final prediction score is averaged over these 10 SVM outputs. In general, the predicted ubiquitination sites at a low false positive rate are more informative for practical applications. To quantitatively understand the reliability of the prediction, we provided the threshold values for two different confidence levels, which correspond to the false positive rates of 2% and 10%, respectively. It should be pointed out that the above two threshold values were based on a

**Table 1.** Comparison of CKSAAP\_UbSite with the binary encoding and UbPred.

| Method                           | $Sn(\%)$   | $Sp(\%)$   | $Ac(\%)$   | $MCC$         |
|----------------------------------|------------|------------|------------|---------------|
| CKSAAP_UbSite <sup>a</sup>       | 69.85±1.67 | 76.96±2.52 | 73.40±1.71 | 0.4694±0.0347 |
| The binary encoding <sup>a</sup> | 56.23±2.21 | 60.04±3.56 | 58.14±2.30 | 0.1630±0.0486 |
| UbPred <sup>b</sup>              | --         | --         | 72.00      | --            |

<sup>a</sup>The corresponding measurement was represented as the average value ± standard deviation.

<sup>b</sup>The corresponding value was cited from Radivojac et al (2010) [2]. ‘--’ means the corresponding value is not available.

doi:10.1371/journal.pone.0022930.t001

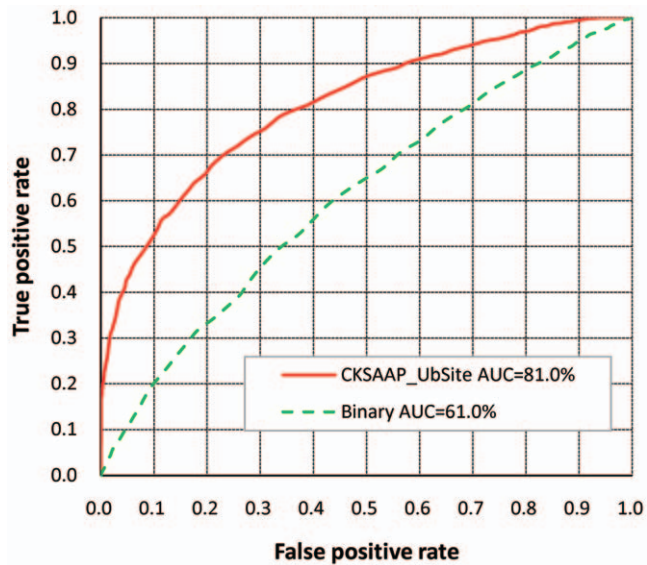

**Figure 1. ROC curves of CKSAAP\_UbSite and the binary encoding scheme based on balanced ubiquitination and non-ubiquitination sites.** The performance of CKSAAP\_UbSite and the binary encoding scheme was assessed through a 100-fold cross-validation strategy.  
doi:10.1371/journal.pone.0022930.g001

balanced dataset. In fact, the ubiquitination and non-ubiquitination sites in proteins are highly unbalanced. For example, the ratio of ubiquitination to non-ubiquitination sites in Radivojac\_dataset is approximately 1:17. For practical applications, more stringent threshold values should be suggested to guarantee the prediction results at a low false positive rate control.

### The significant features

Although the two feature selection methods did not result in performance improvement, they allowed us to pick up most important features (i.e.  $k$ -spaced residue pairs). According to the output of the CHI- and IG- based feature selection methods, the corresponding top-25 residue pairs are listed in Table 2. The composition of the top-25 residue pairs were also presented in two radar diagrams (Figure 2). As can be seen from Figure 2, the composition of these top-25 features, either inferred from CHI- or IG-based feature selection, are remarkably different in ubiquitination and non-ubiquitination sites. Interestingly, there are 19 residue pairs appearing in the two top-25 feature subsets, implying a good consistency between these two feature selection methods. The importance of these 19 residue pairs is also clearly and intuitively characterized in Figure 3A. For instance, the feature ‘ExE’, which represents the ‘EE’ residue pair spaced by any amino acid (i.e. 1-spaced residue pair), is significantly enriched in position pairs (−6/−4, −1/+1, +1/+3, +3/+5 and +6/+8) surrounding the ubiquitination sites. As another example, the importance of ‘KL’ is also represented by its depleted occurrence in some position pairs (−3/−2 and +7/+8) around the ubiquitination sites. In addition to providing some explanations about the powerfulness of the CKSAAP encoding, the important residue pairs listed in Table 2 may also offer some new clues for the sequence patterns around the ubiquitination sites, which indeed deserve for further experimental validation.

### Comparison with the binary encoding scheme

When compared with the binary encoding scheme by using the same dataset (i.e. Radivojac\_dataset), the proposed CKSAAP

**Table 2.** The top 25 features ranked by CHI- and IG- based feature selection methods.

| Top 25 features | CHI                      | IG            |
|-----------------|--------------------------|---------------|
| 1               | <b>ExE<sup>a,b</sup></b> | <b>ExE</b>    |
| 2               | <b>EQ</b>                | <b>KxxK</b>   |
| 3               | <b>QxxxxR</b>            | <b>EQ</b>     |
| 4               | <b>NxN</b>               | <b>ExxE</b>   |
| 5               | <b>ExQ</b>               | <b>NxN</b>    |
| 6               | <b>SxxQ</b>              | <b>EE</b>     |
| 7               | <b>ExxE</b>              | <b>ExxxxE</b> |
| 8               | <b>DE</b>                | <b>KxL</b>    |
| 9               | <b>EE</b>                | <b>ExxxxA</b> |
| 10              | <b>ExxxD</b>             | <b>KL</b>     |
| 11              | HxxxxN                   | <b>DE</b>     |
| 12              | <b>ExN</b>               | LxK           |
| 13              | <b>ExxxxE</b>            | lxxxxl        |
| 14              | <b>KxxK</b>              | lxxxxL        |
| 15              | <b>ExxxxA</b>            | KK            |
| 16              | PxY                      | <b>ExxxD</b>  |
| 17              | QxxN                     | <b>ExQ</b>    |
| 18              | <b>ExxxE</b>             | <b>QxxxxR</b> |
| 19              | <b>ExxxT</b>             | <b>SxxQ</b>   |
| 20              | <b>DxxxxS</b>            | <b>ExxxE</b>  |
| 21              | SxN                      | <b>ExN</b>    |
| 22              | <b>KxL</b>               | <b>DxxxxS</b> |
| 23              | NE                       | KxxxK         |
| 24              | <b>KL</b>                | <b>ExxxT</b>  |
| 25              | ExxA                     | lxxxL         |

<sup>a</sup>The feature ‘ExE’ represents a 1-spaced residue pair of ‘EE’, where x stands for any amino acid. The same representation was applied to other  $k$ -spaced residue pairs.

<sup>b</sup>The  $k$ -spaced amino acid pairs in bold type mean they are consistently ranked as the top-25 features by both feature selection methods.  
doi:10.1371/journal.pone.0022930.t002

encoding revealed about 15% higher  $A_c$  and a nearly 0.30 increment of  $MCC$  (Table 1). The better performance of the proposed CKSAAP encoding was further illustrated by the ROC analysis (Figure 1), in which CKSAAP\_UbSite outperformed the binary encoding by showing about 0.20 higher AUC value. All the above results clearly showed that the CKSAAP encoding has a significant advantage over the binary encoding in predicting ubiquitination sites.

In general, the binary encoding characterizes the position-specific feature of a sequence fragment. In other words, the binary encoding would perform well in case that the fragments surrounding the ubiquitination sites have some position-specific conservation patterns. On the contrary, the CKSAAP encoding pays attention on the collocation of amino acid pairs at different positions surrounding ubiquitination sites, which can also reflect the composition of short linear motifs [36] to some extent. Often residing in disordered regions, these short linear motifs contain three to eight residues, in which two or three key residues are conserved [36]. The short linear motifs have been widely reported to be involved in many biological processes such as the communication of protein-protein interaction [36]. Compared with the binary encoding scheme, the better performance of CKSAAP\_UbSite implied that short linear motifs maybe more



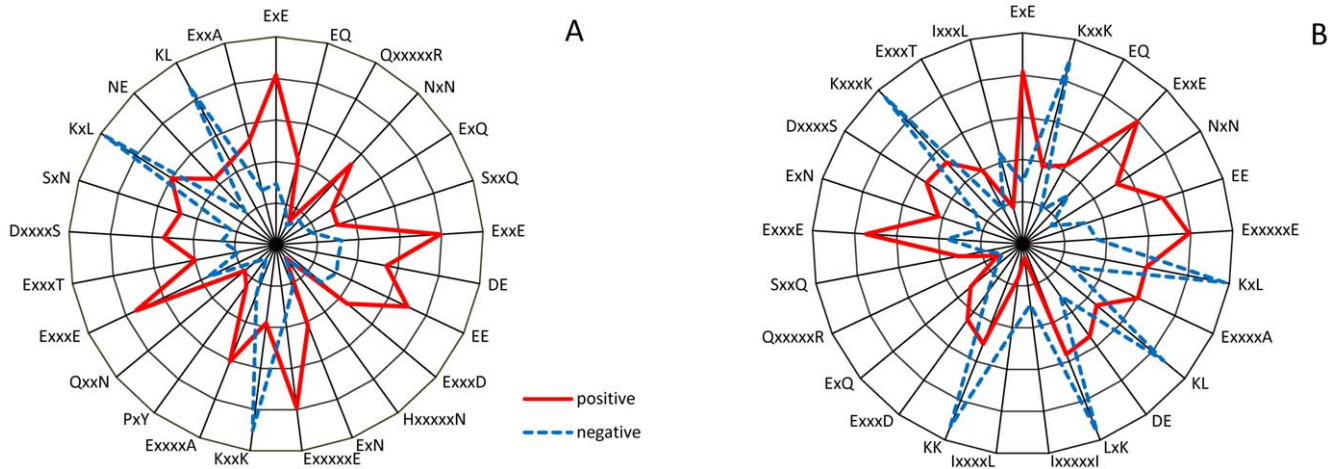

**Figure 2. The composition of the top-25 residue pairs resulting from two feature selection methods.** The composition of each residue pair is represented by a radial vector whose length is proportional to the composition concerned. doi:10.1371/journal.pone.0022930.g002

important than position-specific patterns in recognizing ubiquitinated substrates. Since the binary encoding scheme or position-specific sequence features have been widely used in diverse PTM site prediction tasks [37–39], we might also expect a better performance of the CKSAAP encoding in the prediction of other PTM sites. In fact, we have experienced a more powerful performance of the CKSAAP encoding in mucin-type O-glycosylation site prediction [16], while its performance in predicting phosphorylation and sumoylation sites did not outperform the binary encoding scheme (data not shown). It is also worth mentioning that the CKSAAP

encoding has been reported to predict the structural property of a sequence fragment [22]. Therefore, the performance of CKSAAP-UbSite may further imply that some structural constraints are required for ubiquitination sites.

### Comparison of CKSAAP\_UbSite with three existing predictors

The proposed CKSAAP\_UbSite was firstly benchmarked against UbPred. Since CKSAAP and UbPred are based on the

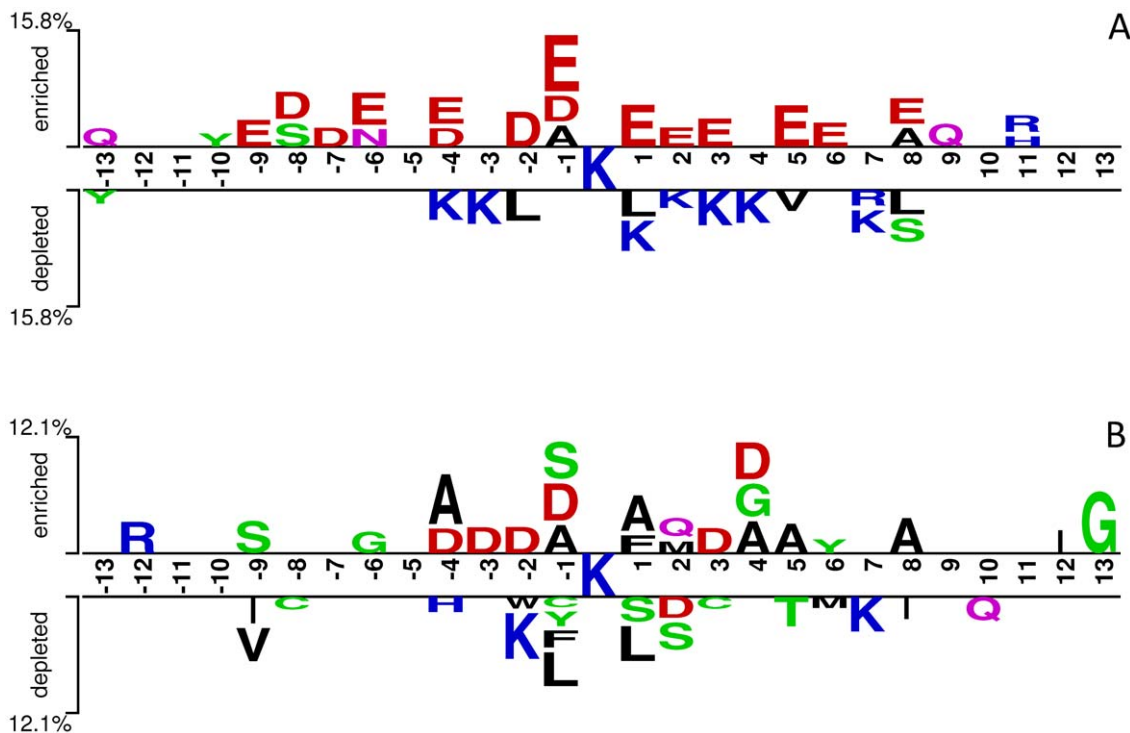

**Figure 3. Two Two-Sample-Logos of the position-specific residue composition surrounding the ubiquitination sites and non-ubiquitination sites, which were inferred from Radivojac\_dataset (A) and Cai\_dataset\_1 (B), respectively.** These two logos were prepared using the web server <http://www.twosamplelogo.org/> and only residues significantly enriched and depleted surrounding ubiquitination sites ( $t$ -test,  $P < 0.05$ ) are shown. doi:10.1371/journal.pone.0022930.g003

same dataset and they adopted the same ratio of positive to negative samples (1:1), which allowed a comparatively fair assessment between these two predictors. As shown in Table 1, the performance of CKSAAP\_UbSite is reasonably better than UbPred by showing 1.4% higher prediction accuracy. To complement the comparison, we also conducted a benchmark experiment between CKSAAP\_UbSite and UbPred on an independent test dataset. The test set was compiled through our literature reading, which covers 21 ubiquitylated proteins experimentally reported in the past two years. The test set contains 37 ubiquitination sites and 639 non-ubiquitination sites (Supporting Information Text S3). To conduct a comparison on this test set, these 21 proteins were processed via the web servers of CKSAAP\_UbSite and UbPred, and the results were characterized by the ROC analysis. As shown in Figure 4, CKSAAP\_UbSite generally outperforms UbPred by showing a nearly 0.014 higher AUC value, although CKSAAP\_UbSite results in slightly lower true positive rates at low false positive rate controls. Surprisingly, both CKSAAP\_UbSite and UbPred reveal dramatically lower performance on this test set when compared with the corresponding performance tested on Radivojac\_dataset, implying that the sequence patterns around ubiquitination sites in Radivojac\_dataset and the 21 proteins are remarkably different. Since these 21 proteins were mainly selected from the proteome of human, the current CKSAAP\_UbSite and UbPred predictors, which were mainly inferred from yeast proteins, may be not fully suitable for the ubiquitination site identification of these 21 proteins.

We also compared CKSAAP\_UbSite with a newly predictor developed by Cai et al (2011) [21]. Cai et al's method was trained and tested on a dataset of 364 ubiquitination sites and 1092 non-ubiquitination sites (i.e. Cai\_dataset\_1), which covers ubiquitylated substrates from diverse species. Approximately 50% and 35% ubiquitylated substrates in Cai\_dataset\_1 were collected from the proteomes of human and yeast, respectively. The ratio of ubiquitination sites to non-ubiquitination sites in Cai et al's method was set to 1:3 and the jackknife cross-validation was conducted. Furthermore, Cai et al's method was also tested in 12 independent proteins (i.e. Cai\_dataset\_2), which contain 14

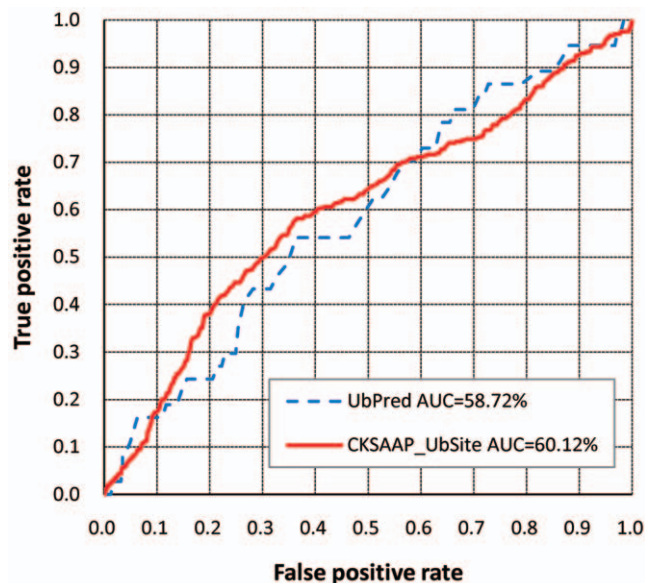

**Figure 4. Comparison of CKSAAP\_UbSite and UbPred based on an independent dataset of 21 proteins.**  
doi:10.1371/journal.pone.0022930.g004

ubiquitination sites and 267 non-ubiquitination sites. To have a fair comparison between CKSAAP\_UbSite and Cai et al's method, we retrained CKSAAP\_UbSite on Cai\_dataset\_1 and characterized the performance on the jackknife cross-validation. To save computational time, the default parameters ( $C=1.9405$  and  $\gamma=1.0$ ) of the RBF kernel in SVM training were employed in this benchmark experiment. Meanwhile, we also tested the performance on Cai\_dataset\_2. In general, CKSAAP\_UbSite outperformed Cai et al's method considerably in both of the jackknife cross-validation and the test on Cai\_dataset\_2 (Table 3). Compared with the performance of CKSAAP\_UbSite based on Radivojac\_dataset, the performance tested on Cai\_dataset\_1 and Cai\_dataset\_2 is much poorer. To rule out the possibility that the decreased performance was caused by the different ratios of ubiquitination and non-ubiquitination sites, we also retrained and tested the performance of CKSAAP\_UbSite with a 1:3 ratio of ubiquitination sites to non-ubiquitination sites in Radivojac\_dataset. Even with the same ratio of positive to negative samples as Cai\_dataset\_1, CKSAAP\_UbSite performed much better in Radivojac\_dataset than in Cai\_dataset\_1 (Table 3). Since Cai\_dataset\_1 was selected from different proteomes, Radivojac\_dataset and Cai\_dataset\_1 have remarkably different sequence patterns around ubiquitination sites (Figure 3A and B). In line with the poor performance of UbPred and CKSAAP\_UbSite in our manually-curated test set (Figure 4), the decreased performance in Cai\_dataset\_1 may imply that the sequence patterns around ubiquitination sites are not conserved across different organisms. Therefore, the development of organism-specific ubiquitination site predictor is necessary to obtain the maximal performance.

We also compared CKSAAP\_UbSite with the predictor proposed by Tung and Ho (2008) indirectly. As reported by Radivojac et al (2010), UbPred outperformed Tung and Ho's method when tested on some newly identified ubiquitination sites. Moreover, Cai et al (2011) also benchmarked their method against Tung and Ho's method on the independent test set (i.e. Cai\_dataset\_2) and showed higher *MCC* (Table 3). Since CKSAAP\_UbSite has been benchmarked to have better performance than UbPred and Cai et al's method, it is reasonable to believe that CKSAAP\_UbSite should also be more powerful than Tung and Ho's method. All the three existing methods are statistical- or machine learning-based predictors and they employed hybrid sequence features. Compared with these three predictors, it is worth mentioning that the formula of the CKSAAP encoding is much more concise, although the dimension of the CKSAAP is still higher than the other feature vectors employed in the three peer predictors. More importantly, the reasonably good performance of CKSAAP\_UbSite reflected that the CKSAAP encoding can effectively capture the information of enriched/depleted residue pairs around ubiquitination sites.

## Conclusion

In order to detect ubiquitination sites in query proteins, we developed a SVM-based predictor termed as CKSAAP\_UbSite, which has been benchmarked to have better performance than some other existing predictors. With the ability of reflecting the sequence patterns surrounding the ubiquitination sites, the CKSAAP encoding has been proved to be particularly suitable for the prediction of ubiquitination sites. To facilitate the biological community, a web-server of CKSAAP\_UbSite was constructed, which can be freely accessible at [http://protein.cau.edu.cn/cksaap\\_ubsite/](http://protein.cau.edu.cn/cksaap_ubsite/). Considering that the sequence patterns around ubiquitination sites in different organisms are not conserved, the real-world applications of the current predictor should be limited to the proteome of yeast. With the increment of

**Table 3.** Comparison of CKSAAP\_UbSite with other predictors.

| Method                       | Dataset           | Ratio | <i>Sn</i> (%) | <i>Sp</i> (%) | <i>Ac</i> (%) | <i>MCC</i> |
|------------------------------|-------------------|-------|---------------|---------------|---------------|------------|
| CKSAAP_UbSite <sup>a,b</sup> | Radivojac_dataset | 1:3   | 20.38         | 98.48         | 78.95         | 0.3374     |
| CKSAAP_UbSite <sup>a,c</sup> | Cai_dataset_1     | 1:3   | 6.74          | 99.53         | 76.33         | 0.1923     |
| CKSAAP_UbSite <sup>a</sup>   | Cai_dataset_2     | 1:3   | 7.14          | 100.00        | 95.37         | 0.2610     |
| Cai et al <sup>c,d</sup>     | Cai_dataset_1     | 1:3   | --            | --            | --            | 0.1420     |
| Cai et al <sup>d</sup>       | Cai_dataset_2     | 1:3   | --            | --            | --            | 0.1390     |
| UbPred <sup>d</sup>          | Cai_dataset_2     | 1:3   | --            | --            | --            | 0.1350     |
| Tung and Ho <sup>d</sup>     | Cai_dataset_2     | 1:3   | --            | --            | --            | 0.1170     |

<sup>a</sup>To save computational time, the default parameters of the RBF kernel in SVM training were employed in this benchmark experiment.

<sup>b</sup>The result was based on the 100-fold cross-validation.

<sup>c</sup>The result was based on the jackknife cross-validation.

<sup>d</sup>The corresponding value was cited from Cai et al (2011) [21]. '--' means the corresponding value is not available.

doi:10.1371/journal.pone.0022930.t003

experimentally verified ubiquitination sites in the near future, we forecast that more attention will be paid on the development of organism-specific predictors in order to maximize the prediction performance of ubiquitination sites.

## Supporting Information

**Text S1** This file contains 263 ubiquitination and 4345 non-ubiquitination sites (i.e. Radivojac\_dataset). Additionally, the 10 subsets of non-ubiquitination sites selected from the 4345 negative samples were also listed.

(TXT)

**Text S2** This file shows the performance measurements of CKSAAP\_UbSite for 10 different negative samples.

(DOC)

## References

- Haglund K, Dikic I (2005) Ubiquitylation and cell signaling. *EMBO J* 24: 3353–3359.
- Radivojac P, Vacic V, Haynes C, Cocklin RR, Mohan A, et al. (2010) Identification, analysis, and prediction of protein ubiquitination sites. *Proteins* 78: 365–380.
- Tung CW, Ho SY (2008) Computational identification of ubiquitylation sites from protein sequences. *BMC Bioinformatics* 9: 310.
- Hershko A, Ciechanover A (1998) The ubiquitin system. *Annu Rev Biochem* 67: 425–479.
- Hicke L (2001) Protein regulation by monoubiquitin. *Nat Rev Mol Cell Biol* 2: 195–201.
- Pickart CM (2001) Ubiquitin enters the new millennium. *Mol Cell* 8: 499–504.
- Schwartz AL, Ciechanover A (1999) The ubiquitin-proteasome pathway and pathogenesis of human diseases. *Annu Rev Med* 50: 57–74.
- Herrmann J, Lerman LO, Lerman A (2007) Ubiquitin and ubiquitin-like proteins in protein regulation. *Circ Res* 100: 1276–1291.
- Tomlinson E, Palaniyappan N, Tooth D, Layfield R (2007) Methods for the purification of ubiquitinated proteins. *Proteomics* 7: 1016–1022.
- Peng J, Schwartz D, Elias JE, Thoreen CC, Cheng D, et al. (2003) A proteomics approach to understanding protein ubiquitination. *Nat Biotechnol* 21: 921–926.
- Hitchcock AL, Auld K, Gygi SP, Silver PA (2003) A subset of membrane-associated proteins is ubiquitinated in response to mutations in the endoplasmic reticulum degradation machinery. *Proc Natl Acad Sci U S A* 100: 12735–12740.
- Chernorudskiy AL, Garcia A, Eremin EV, Shorina AS, Kondratieva EV, et al. (2007) UbiProt: a database of ubiquitylated proteins. *BMC Bioinformatics* 8: 126.
- Lee WC, Lee M, Jung JW, Kim KP, Kim D (2008) SCUD: Saccharomyces cerevisiae ubiquitination database. *BMC Genomics* 9: 440.
- Li H, Xing X, Ding G, Li Q, Wang C, et al. (2009) SysPTM: a systematic resource for proteomic research on post-translational modifications. *Mol Cell Proteomics* 8: 1839–1849.
- Catic A, Collins C, Church GM, Ploegh HL (2004) Preferred in vivo ubiquitination sites. *Bioinformatics* 20: 3302–3307.
- Chen YZ, Tang YR, Sheng ZY, Zhang Z (2008) Prediction of mucin-type O-glycosylation sites in mammalian proteins using the composition of k-spaced amino acid pairs. *BMC Bioinformatics* 9: 101.
- Tang YR, Chen YZ, Canchaya CA, Zhang Z (2007) GANNPhos: a new phosphorylation site predictor based on a genetic algorithm integrated neural network. *Protein Eng Des Sel* 20: 405–412.
- Xue Y, Ren J, Gao X, Jin C, Wen L, et al. (2008) GPS 2.0, a tool to predict kinase-specific phosphorylation sites in hierarchy. *Mol Cell Proteomics* 7: 1598–1608.
- Ingrell CR, Miller ML, Jensen ON, Blom N (2007) NetPhosYeast: prediction of protein phosphorylation sites in yeast. *Bioinformatics* 23: 895–897.
- Kawashima S, Pokarowski P, Pokarowska M, Kolinski A, Katayama T, et al. (2008) Aindex: amino acid index database, progress report 2008. *Nucleic Acids Res* 36: D202–205.
- Cai Y, Huang T, Hu L, Shi X, Xie L, et al. (2011) Prediction of lysine ubiquitination with mRMR feature selection and analysis. *Amino Acids*.
- Chen K, Kurgan LA, Ruan J (2007) Prediction of flexible/rigid regions from protein sequences using k-spaced amino acid pairs. *BMC Struct Biol* 7: 25.
- Chen K, Kurgan L, Rahbari M (2007) Prediction of protein crystallization using collocation of amino acid pairs. *Biochem Biophys Res Commun* 355: 764–769.
- Chen K, Kurgan LA, Ruan J (2008) Prediction of protein structural class using novel evolutionary collocation-based sequence representation. *J Comput Chem* 29: 1596–1604.
- Chen K, Jiang Y, Du L, Kurgan L (2009) Prediction of integral membrane protein type by collocated hydrophobic amino acid pairs. *J Comput Chem* 30: 163–172.
- Yang XG, Feng ZP (2002) Predicting membrane protein types using residue-pair models based on reduced similarity dataset. *J Biomol Struct Dyn* 20: 163–172.
- Yang XG, Luo RY, Feng ZP (2007) Using amino acid and peptide composition to predict membrane protein types. *Biochem Biophys Res Commun* 353: 164–169.
- Wang XB, Wu LY, Wang YC, Deng NY (2009) Prediction of palmitoylation sites using the composition of k-spaced amino acid pairs. *Protein Eng Des Sel* 22: 707–712.
- Vapnik VN (1999) An overview of statistical learning theory. *IEEE Trans Neural Netw* 10: 988–999.
- Si JN, Yan RX, Wang C, Zhang Z, Su XD (2009) TIM-Finder: a new method for identifying TIM-barrel proteins. *BMC Struct Biol* 9: 73.

**Text S3** This file contains an independent test set covering 37 ubiquitination sites and 639 non-ubiquitination sites. (TXT)

## Acknowledgments

We thank Dr. Yu Xue (Huazhong University of Science and Technology, China) and Dr. Dong An (China Agricultural University) for helpful discussions on this work. We are also grateful to Dr. Predrag Radivojac at Indiana University (USA) and Dr. Yu-Dong Cai (Shanghai University, China) for sharing their datasets.

## Author Contributions

Conceived and designed the experiments: ZC ZZ. Performed the experiments: ZC. Analyzed the data: ZC Y-ZC X-FW CW R-XY. Wrote the paper: ZC ZZ.

31. Yan RX, Si JN, Wang C, Zhang Z (2009) DescFold: a web server for protein fold recognition. *BMC Bioinformatics* 10: 416.
32. Song J, Tan H, Shen H, Mahmood K, Boyd SE, et al. (2010) Cascleave: towards more accurate prediction of caspase substrate cleavage sites. *Bioinformatics* 26: 752–760.
33. Song J, Burrage K, Yuan Z, Huber T (2006) Prediction of cis/trans isomerization in proteins using PSI-BLAST profiles and secondary structure information. *BMC Bioinformatics* 7: 124.
34. Gribskov M, Robinson NL (1996) Use of receiver operating characteristic (ROC) analysis to evaluate sequence matching. *Comput Chem* 20: 25–33.
35. Centor RM (1991) Signal detectability: the use of ROC curves and their analyses. *Med Decis Making* 11: 102–106.
36. Neduva V, Linding R, Su-Angrand I, Stark A, de Masi F, et al. (2005) Systematic discovery of new recognition peptides mediating protein interaction networks. *PLoS Biol* 3: e405.
37. Shao J, Xu D, Tsai SN, Wang Y, Ngai SM (2009) Computational identification of protein methylation sites through bi-profile Bayes feature extraction. *PLoS One* 4: e4920.
38. Xue Y, Li A, Wang L, Feng H, Yao X (2006) PPSP: prediction of PK-specific phosphorylation site with Bayesian decision theory. *BMC Bioinformatics* 7: 163.
39. Xu J, He Y, Qiang B, Yuan J, Peng X, et al. (2008) A novel method for high accuracy sumoylation site prediction from protein sequences. *BMC Bioinformatics* 9: 8.
